# Supplementary material for: Synergistic Inhibition of MRSA by Chenodeoxycholic Acid and Carbapenem Antibiotics
Source: MDPI journal article supplement (doi:10.3390/antibiotics12010071), 2022-12-31
Supplement: s1 [file s1]

## Supplementary Information for

### **Synergistic inhibition of MRSA by chenodeoxycholic acid and carbapenem antibiotics**

Kaiyu Cui<sup>1†</sup>, Weifeng Yang<sup>1†</sup>, Shuang Liu<sup>1</sup>, Dongying Li<sup>1</sup>, Lu Li<sup>1</sup>, Xing Ren<sup>1</sup>, Yanan Sun<sup>1</sup>, Gaiying He<sup>1</sup>, Shuhua Ma<sup>1</sup>, Jidan Zhang<sup>1</sup>, Qing Wei<sup>2\*</sup>, Yi Wang<sup>1\*</sup>

\*Corresponding author: Email: vubwqing@hotmail.com (Q.W.) and prof.wangyi@foxmail.com (Y.W.).

†These authors have contributed equally to this work.

#### **This PDF file includes:**

Supplementary Text

Figure S1#

Tables S1 and S2#

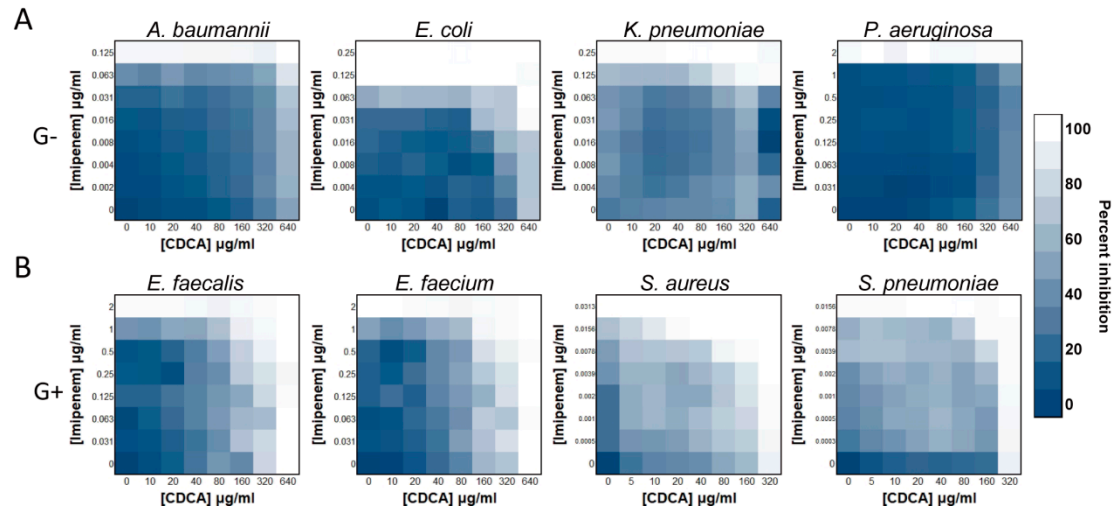

**Figure S1.** CDCA combined with imipenem against common pathogens.

(A) The combination of CDCA and imipenem, evaluated against four G<sup>-</sup> bacteria, *Acinetobacter baumannii*, *Escherichia coli*, *Klebsiella pneumoniae*, and *Pseudomonas aeruginosa*.

(B) The combination of CDCA and imipenem, evaluated against four G<sup>+</sup> bacteria, *Enterococcus faecium*, *Enterococcus faecium*, *Staphylococcus aureus*, and *Streptococcus pneumoniae*.

**Table S1. Strains used in this study.**

| Strain name | Features                                                                   | References                                 |
|-------------|----------------------------------------------------------------------------|--------------------------------------------|
| ATCC 43300  | MRSA                                                                       | Lab collection                             |
| ATCC 25923  | MSSA                                                                       | Lab collection                             |
| MU50        | VISA                                                                       | Lab collection                             |
| 150907015   | Antibiotics resistance: penicillin-G, oxacillin, amikacin                  | Clinical laboratory of Guanganmen Hospital |
| 151010052   | Antibiotics resistance: penicillin-G, oxacillin, amikacin                  | Clinical laboratory of Guanganmen Hospital |
| 180410023   | Antibiotics resistance: penicillin-G, oxacillin                            | Clinical laboratory of Guanganmen Hospital |
| 180211022   | Antibiotics resistance: penicillin-G, oxacillin, amikacin                  | Clinical laboratory of Guanganmen Hospital |
| 180126042   | Antibiotics resistance: penicillin-G, oxacillin                            | Clinical laboratory of Guanganmen Hospital |
| 171213054   | Antibiotics resistance: penicillin-G, oxacillin                            | Clinical laboratory of Guanganmen Hospital |
| 171116025   | Antibiotics resistance: penicillin-G, oxacillin                            | Clinical laboratory of Guanganmen Hospital |
| 171031048   | Antibiotics resistance: penicillin-G, oxacillin                            | Clinical laboratory of Guanganmen Hospital |
| 170911060   | Antibiotics resistance: penicillin-G, oxacillin                            | Clinical laboratory of Guanganmen Hospital |
| 170807024   | Antibiotics resistance: penicillin-G, oxacillin, amikacin                  | Clinical laboratory of Guanganmen Hospital |
| 170714063   | Antibiotics resistance: penicillin-G, oxacillin, amikacin                  | Clinical laboratory of Guanganmen Hospital |
| 161019014   | Antibiotics resistance: penicillin-G, oxacillin;<br>Intermediate: amikacin | Clinical laboratory of Guanganmen Hospital |
| 161008022   | Antibiotics resistance: penicillin-G, oxacillin;<br>Intermediate: amikacin | Clinical laboratory of Guanganmen Hospital |
| 160919055   | Antibiotics resistance: penicillin-G, oxacillin                            | Clinical laboratory of Guanganmen Hospital |
| 151009009   | Antibiotics resistance: penicillin-G, oxacillin, amikacin                  | Clinical laboratory of Guanganmen Hospital |
| 151020006   | Antibiotics resistance: penicillin-G, oxacillin, amikacin                  | Clinical laboratory of Guanganmen Hospital |
| 160115091   | Antibiotics resistance: penicillin-G, oxacillin, amikacin                  | Clinical laboratory of Guanganmen Hospital |
| 160123012   | Antibiotics resistance: penicillin-G, oxacillin                            | Clinical laboratory of Guanganmen Hospital |
| 1611017     | Antibiotics resistance: penicillin-G, oxacillin, amikacin                  | Clinical laboratory of Dongzhimen Hospital |
| 1611078     | Antibiotics resistance: penicillin-G, oxacillin                            | Clinical laboratory of Dongzhimen Hospital |
| 1611099     | Antibiotics resistance: penicillin-G, oxacillin, amikacin                  | Clinical laboratory of Dongzhimen Hospital |
| 1610057     | Antibiotics resistance: penicillin-G, oxacillin, amikacin                  | Clinical laboratory of Dongzhimen Hospital |
| 1702123     | Antibiotics resistance: penicillin-G, oxacillin, amikacin                  | Clinical laboratory of Dongzhimen Hospital |
| 1703118     | Antibiotics resistance: penicillin-G, oxacillin                            | Clinical laboratory of Dongzhimen Hospital |
| ATCC 25922  | <i>Escherichia coli</i>                                                    | Lab collection                             |
| ATCC 27853  | <i>Pseudomonas aeruginosa</i>                                              | Lab collection                             |
| ATCC 4352   | <i>Klebsiella Pneumoniae</i>                                               | Lab collection                             |
| ATCC 22933  | <i>Acinetobacter baumannii</i>                                             | Lab collection                             |
| ATCC 29212  | <i>Enterococcus faecalis</i>                                               | Lab collection                             |
| ATCC 19434  | <i>Enterococcus faecium</i>                                                | Lab collection                             |
| ATCC 49619  | <i>Streptococcus pneumoniae</i>                                            | Lab collection                             |

**Table S2. CDCA-treated MRSA differential proteins in exponential growth phase.**

| Protein    | Description                                           | Gene                 | UP&DOW<br>N |
|------------|-------------------------------------------------------|----------------------|-------------|
| A0A0H3JRU9 | Pyruvate carboxylase                                  | <i>pycA</i>          | down        |
| Q6GC82     | Inosine-5-monophosphate dehydrogenase                 | <i>guaB</i>          | down        |
| P99161     | Transketolase                                         | <i>tkt</i>           | down        |
| Q6GFV0     | Putative dipeptidase SAR1836                          | <i>SAR1836</i>       | down        |
| A7WYT1     | Pyridoxal 5-phosphate synthase subunit PdxS           | <i>pdxS</i>          | down        |
| Q6GFZ6     | Acetate kinase                                        | <i>ackA</i>          | down        |
| P63871     | Cysteine synthase                                     | <i>cysK</i>          | down        |
| Q5HKH9     | Formate acetyltransferase                             | <i>pflB</i>          | down        |
| Q6GAV6     | Coenzyme A disulfide reductase                        | <i>cdr</i>           | down        |
| Q6GID1     | Ornithine aminotransferase 2                          | <i>rocD2</i>         | down        |
| Q6GJB4     | Probable branched-chain-amino-acid aminotransferase   | <i>ilvE</i>          | down        |
| Q5HRM8     | ATP-dependent Clp protease ATP-binding subunit ClpC   | <i>clpC</i>          | down        |
| Q5HCV0     | L-lactate dehydrogenase 2                             | <i>ldh2</i>          | down        |
| Q6GDH2     | Clumping factor B                                     | <i>clfB</i>          | down        |
| A7WXP7     | L-lactate dehydrogenase 1                             | <i>ldh1</i>          | down        |
| P63513     | Probable branched-chain-amino-acid aminotransferase   | <i>ilvE</i>          | down        |
| Q2FXL6     | Putative universal stress protein SAOUHSC_01819       | <i>SAOUHSC_01819</i> | down        |
| Q5HL19     | Probable malate:quinone oxidoreductase 4              | <i>mgo4</i>          | down        |
| Q7A742     | Alcohol dehydrogenase                                 | <i>adh</i>           | down        |
| Q6GKB1     | Type-1 restriction enzyme R protein                   | <i>hsdR</i>          | down        |
| Q6GGY2     | DegV domain-containing protein SAR1438                | <i>SAR1438</i>       | down        |
| Q2FWX9     | 4,4-diaponeurosporen-aldehyde dehydrogenase           | <i>aldH1</i>         | down        |
| Q6GI15     | Phosphoribosylformylglycinamide synthase subunit PurL | <i>purL</i>          | down        |
| Q6GFB8     | Protein map                                           | <i>map</i>           | down        |
| Q2G1C2     | Teichoic acid ribitol-phosphate polymerase TarK       | <i>tarK</i>          | down        |
| Q2YXC5     | Glutamate racemase                                    | <i>murI</i>          | down        |
| Q6GGW9     | Alanine dehydrogenase 1                               | <i>ald1</i>          | down        |
| Q6GIR8     | Histidinol-phosphate aminotransferase                 | <i>hisC</i>          | down        |
| Q2FWZ8     | Bacterial non-heme ferritin                           | <i>ftnA</i>          | down        |
| Q6GI14     | Amidophosphoribosyltransferase                        | <i>purF</i>          | down        |
| Q6GK53     | Iron-sulfur cluster repair protein ScdA               | <i>scdA</i>          | down        |
| Q99W83     | Pyridoxal 5-phosphate synthase subunit PdxT           | <i>pdxT</i>          | down        |
| Q5HRR5     | Methionine--tRNA ligase                               | <i>metG</i>          | down        |
| Q6GH18     | Phosphate-binding protein PstS                        | <i>pstS</i>          | down        |
| Q6GEY7     | Cardiolipin synthase 2                                | <i>cls2</i>          | down        |
| Q6GB81     | DegV domain-containing protein SAS0714                | <i>SAS0714</i>       | down        |
| Q6GI16     | Phosphoribosylformylglycinamide synthase subunit PurQ | <i>purQ</i>          | down        |

|            |                                                                                                   |                      |      |
|------------|---------------------------------------------------------------------------------------------------|----------------------|------|
| Q6GI18     | Phosphoribosylaminoimidazole-succinocarboxamide synthase                                          | <i>purC</i>          | down |
| Q2YY67     | L-threonine dehydratase catabolic TdcB                                                            | <i>tdcB</i>          | down |
| P56740     | Dihydroneopterin aldolase                                                                         | <i>folB</i>          | down |
| Q99VJ0     | Thermonuclease                                                                                    | <i>nuc</i>           | down |
| Q5HQW4     | Thioredoxin reductase                                                                             | <i>trxB</i>          | down |
| Q2FZZ2     | Methionine import ATP-binding protein MetN 2                                                      | <i>metN2</i>         | down |
| P0A0N7     | Ribosomal RNA large subunit methyltransferase H                                                   | <i>rlmH</i>          | down |
| A5ISF7     | 30S ribosomal protein S15                                                                         | <i>rpsO</i>          | down |
| Q2YYA2     | Ribonuclease Z                                                                                    | <i>rnz</i>           | down |
| Q6GI30     | Putative acetyltransferase SAR1027                                                                | <i>SAR1027</i>       | down |
| Q6GI19     | N5-carboxyaminoimidazole ribonucleotide synthase                                                  | <i>purK</i>          | down |
| A0A0H3JUG6 | Epoxyqueuosine reductase QueH                                                                     | <i>queH</i>          | down |
| Q2YVB1     | N-acetylneuraminate lyase                                                                         | <i>nanA</i>          | down |
| Q6GEM5     | Uncharacterized hydrolase SAR2294                                                                 | <i>SAR2294</i>       | down |
| Q6G816     | Sodium-dependent dicarboxylate transporter SdcS                                                   | <i>sdcS</i>          | down |
| Q6GAE1     | Phosphoribosylglycinamide formyltransferase                                                       | <i>purN</i>          | down |
| Q99SE4     | UPF0340 protein SAV2114                                                                           | <i>SAV2114</i>       | down |
| O32421     | Probable cell wall amidase LytH                                                                   | <i>lytH</i>          | down |
| Q6GJM1     | UPF0753 protein SAR0453                                                                           | <i>SAR0453</i>       | down |
| Q2YX68     | UPF0637 protein SAB0972c                                                                          | <i>SAB0972c</i>      | down |
| Q2YX52     | Phosphoribosylformylglycinamide cyclo-ligase                                                      | <i>purM</i>          | down |
| Q99S97     | Multidrug efflux pump SdrM                                                                        | <i>sdrM</i>          | down |
| Q2YV56     | Transcriptional regulatory protein HptR                                                           | <i>hptR</i>          | down |
| Q2FJJ9     | Uncharacterized lipoprotein SAUSA300_0416                                                         | <i>SAUSA300_0416</i> | down |
| Q5HL85     | Putative ribose uptake protein RbsU                                                               | <i>rbsU</i>          | down |
| Q6G6I7     | Uncharacterized protein SAS2374                                                                   | <i>SAS2374</i>       | down |
| Q6GI31     | Bifunctional autolysin                                                                            | <i>atl</i>           | up   |
| A8Z4B9     | Chaperone protein DnaK                                                                            | <i>dnaK</i>          | up   |
| Q6GES3     | Glutamine--fructose-6-phosphate aminotransferase [isomerizing]                                    | <i>glmS</i>          | up   |
| Q6GIK4     | Clumping factor A                                                                                 | <i>clfA</i>          | up   |
| Q6GEV3     | Putative aldehyde dehydrogenase                                                                   | <i>SAR2210</i>       | up   |
| Q6GI01     | Phosphoenolpyruvate-protein phosphotransferase                                                    | <i>ptsI</i>          | up   |
| Q99V14     | Phosphoenolpyruvate-protein phosphotransferase                                                    | <i>ptsI</i>          | up   |
| Q6GHI9     | Succinate--CoA ligase [ADP-forming] subunit alpha                                                 | <i>sucD</i>          | up   |
| Q6GIE7     | Type II NADH:quinone oxidoreductase                                                               | <i>SAR0903</i>       | up   |
| Q6GGZ6     | Dihydrolipoyllysine-residue succinyltransferase component of 2-oxoglutarate dehydrogenase complex | <i>odhB</i>          | up   |
| Q6GIA3     | 3-oxoacyl-[acyl-carrier-protein] synthase 2                                                       | <i>fabF</i>          | up   |
| Q2G0P0     | 50S ribosomal protein L1                                                                          | <i>rplA</i>          | up   |
| Q6GEX5     | UDP-N-acetylglucosamine 1-carboxyvinyltransferase 1                                               | <i>murA1</i>         | up   |
| Q8NX10     | Phosphate acyltransferase                                                                         | <i>plsX</i>          | up   |
| Q6GE17     | 2,3-bisphosphoglycerate-dependent phosphoglycerate                                                | <i>gpmA</i>          | up   |

|            |                                                            |                 |    |
|------------|------------------------------------------------------------|-----------------|----|
|            | mutase                                                     |                 |    |
| Q6GA75     | Phenylalanine--tRNA ligase beta subunit                    | <i>pheT</i>     | up |
| Q2YSF6     | Epimerase family protein SAB0724c                          | <i>SAB0724c</i> | up |
| A8Z425     | Cell cycle protein GpsB                                    | <i>gpsB</i>     | up |
| Q6GB45     | Clumping factor A                                          | <i>clfA</i>     | up |
| Q5HNL1     | Isocitrate dehydrogenase [NADP]                            | <i>icd</i>      | up |
| Q99UA7     | Aminoacyltransferase FemA                                  | <i>femA</i>     | up |
| Q6GEV1     | UDP-N-acetylglucosamine 1-carboxyvinyltransferase 2        | <i>murA2</i>    | up |
| A6U089     | 3-oxoacyl-[acyl-carrier-protein] synthase 3                | <i>fabH</i>     | up |
| A5ISB7     | Acyl carrier protein                                       | <i>acpP</i>     | up |
| Q6GGE2     | Probable endonuclease 4                                    | <i>nfo</i>      | up |
| Q6G664     | Oxygen-dependent choline dehydrogenase                     | <i>betA</i>     | up |
| Q2FXZ3     | Chaperone protein DnaJ                                     | <i>dnaJ</i>     | up |
| Q6GFH7     | UPF0435 protein SAR1970                                    | <i>SAR1970</i>  | up |
| Q5HE93     | ATP synthase subunit b                                     | <i>atpF</i>     | up |
| P95695     | Capsular polysaccharide type 5 biosynthesis protein cap5A  | <i>cap5A</i>    | up |
| Q6GHQ2     | UDP-N-acetylmuramoylalanine--D-glutamate ligase            | <i>murD</i>     | up |
| P0C1S0     | HTH-type transcriptional regulator MgrA                    | <i>mgrA</i>     | up |
| A7X5E9     | 50S ribosomal protein L14                                  | <i>rplN</i>     | up |
| Q5HM31     | 50S ribosomal protein L13                                  | <i>rplM</i>     | up |
| Q2YYL3     | 50S ribosomal protein L18                                  | <i>rplR</i>     | up |
| Q5HPY8     | Carbamoyl-phosphate synthase large chain                   | <i>carB</i>     | up |
| Q7A6L9     | UPF0337 protein SA0772                                     | <i>SA0772</i>   | up |
| Q6GJG1     | Hypoxanthine-guanine phosphoribosyltransferase             | <i>hpt</i>      | up |
| A8Z2R5     | Aspartyl/glutamyl-tRNA(Asn/Gln) amidotransferase subunit C | <i>gatC</i>     | up |
| Q7A0Y4     | Regulatory protein MsrR                                    | <i>msrR</i>     | up |
| Q6GEA0     | Lysostaphin resistance protein A                           | <i>lyrA</i>     | up |
| Q2FXZ1     | Protein GrpE                                               | <i>grpE</i>     | up |
| P0C600     | 6,7-dimethyl-8-ribityllumazine synthase                    | <i>ribH</i>     | up |
| Q6G789     | 50S ribosomal protein L30                                  | <i>rpmD</i>     | up |
| Q2G2P5     | Nickel-binding protein NikA                                | <i>nikA</i>     | up |
| Q2YSG0     | Probable cell division protein WhiA                        | <i>whiA</i>     | up |
| Q6GK35     | Glycyl-glycine endopeptidase LytM                          | <i>lytM</i>     | up |
| Q2G2P8     | ADP-dependent (S)-NAD(P)H-hydrate dehydratase              | <i>nnrD</i>     | up |
| Q6GEX9     | Probable transglycosylase SceD                             | <i>sceD</i>     | up |
| P0A059     | Potassium-transporting ATPase KdpC subunit 2               | <i>kdpC2</i>    | up |
| A0A0H3JT43 | Glycine cleavage system H-like protein                     | <i>SAV0324</i>  | up |
| Q6GI27     | Teichoic acid D-alanine hydrolase                          | <i>fmtA</i>     | up |
| P60074     | UPF0291 protein SAV1341                                    | <i>SAV1341</i>  | up |
| Q5HQ35     | Phenylalanine--tRNA ligase beta subunit                    | <i>pheT</i>     | up |
| Q6G6U7     | Ferredoxin--NADP reductase                                 | <i>SAS2264</i>  | up |
| Q6GDM3     | HTH-type transcriptional regulator SAR2658                 | <i>SAR2658</i>  | up |

|        |                                                   |                                 |    |
|--------|---------------------------------------------------|---------------------------------|----|
| A8Z334 | 50S ribosomal protein L36                         | <i>rpmJ</i>                     | up |
| Q2G1T3 | Organic hydroperoxide resistance protein-like     | <i>SAOUHSC_0083</i><br><i>l</i> | up |
| Q5HMZ0 | 10 kDa chaperonin                                 | <i>groS</i>                     | up |
| Q8NXW9 | Putative proline/betaine transporter              | <i>proP</i>                     | up |
| P39853 | Capsular polysaccharide biosynthesis protein CapD | <i>capD</i>                     | up |
| Q7A805 | N-acetylmuramic acid 6-phosphate etherase         | <i>murQ</i>                     | up |
| A6U223 | 50S ribosomal protein L33 3                       | <i>rpmG3</i>                    | up |
| Q6GH76 | Homoserine kinase                                 | <i>thrB</i>                     | up |
| A6TZ11 | 50S ribosomal protein L33 1                       | <i>rpmG1</i>                    | up |
| Q6GDN4 | Glycosyl-4,4-diaponeurosporenoate acyltransferase | <i>crtO</i>                     | up |
| Q5HM15 | 50S ribosomal protein L18                         | <i>rplR</i>                     | up |
| Q2YYQ7 | Urease subunit beta                               | <i>ureB</i>                     | up |
| A5IU61 | DNA polymerase IV                                 | <i>dinB</i>                     | up |
| Q5HQ10 | Phospho-N-acetylmuramoyl-pentapeptide-transferase | <i>mraY</i>                     | up |
| A6QGZ7 | UPF0398 protein NWMN_1357                         | <i>NWMN_1357</i>                | up |
| Q6GJ90 | Protein VraX                                      | <i>vraX</i>                     | up |
| Q2YX16 | Probable quinol oxidase subunit 3                 | <i>qoxC</i>                     | up |
| Q5HQV8 | Epimerase family protein SERP0438                 | <i>SERP0438</i>                 | up |
| Q99TA0 | Riboflavin biosynthesis protein RibBA             | <i>ribBA</i>                    | up |
| Q6GF11 | Protein SprT-like                                 | <i>SAR2150</i>                  | up |
| Q8NYB7 | Protein-ADP-ribose hydrolase                      | <i>MW0302</i>                   | up |
| Q99SN8 | Uncharacterized leukocidin-like protein 1         | <i>SAV2004</i>                  | up |
| Q6GH70 | 30S ribosomal protein S14                         | <i>rpsN</i>                     | up |
| Q2FDE7 | Ribonuclease P protein component                  | <i>rnpA</i>                     | up |
| Q2YY57 | Holliday junction resolvase RecU                  | <i>recU</i>                     | up |

---
